# Supplementary material for: Characterization of glycosyl dioxolenium ions and their role in glycosylation reactions
Source: PubMed Central journal article supplement (PMC7260182; doi:10.1038/s41467-020-16362-x), 2020-05-29
Supplement: 41467_2020_16362_MOESM2_ESM.pdf [file 41467_2020_16362_MOESM2_ESM.pdf]

## Description of Additional Supplementary Files

File Name: Supplementary Data 1

Description: xyz coordinates of DFT calculated structures.
